# Supplementary material
Source: Springer Nature journal article supplement (https://www.springermedizin.de/resource/supplementary/12974_2007_119_MOESM2_ESM.pdf/9600850)
Supplement: MOESM2 [file 9600850]

10/30/07

# MONTREAL COGNITIVE ASSESSMENT (MOCA)

NAME :  
Education :  
Sex : ♂

Date of birth :  
DATE :

## VISUOSPATIAL / EXECUTIVE

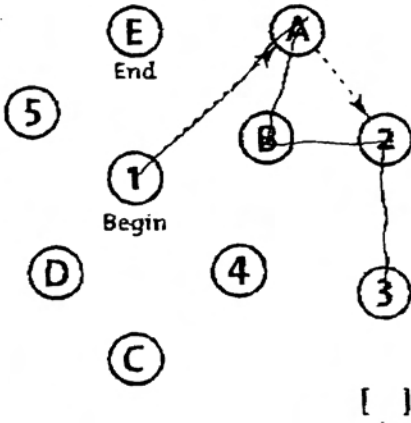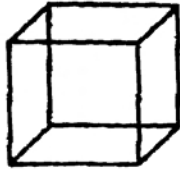

Copy cube

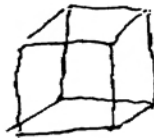

Draw CLOCK (Ten past eleven)  
(3 points)

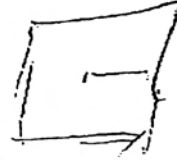

POINTS

Contour

Numbers

Hands

1/5

# MONTREAL COGNITIVE ASSESSMENT (MOCA)

NAME :  
Education :  
Sex :

10/30/07

Date of birth :  
DATE : 10/21/07

## VISUOSPATIAL / EXECUTIVE

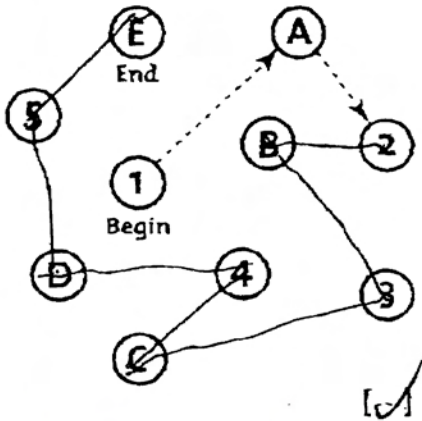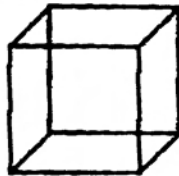

Copy cube

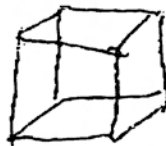

Draw: CLOCK (Ten past eleven)  
(3 points)

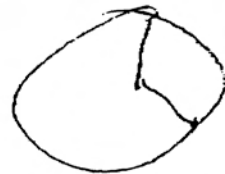

POINTS

Contour

Numbers

Hands

3/5

# MONTREAL COGNITIVE ASSESSMENT (MOCA)

Education :  
Sex : M

Date of birth :  
DATE : 12/19/07

## VISUOSPATIAL / EXECUTIVE

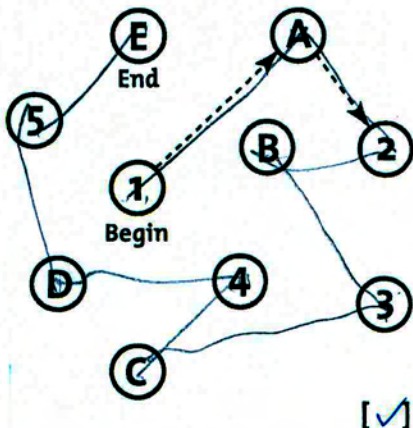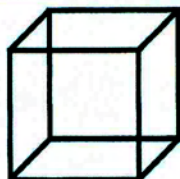

Copy cube

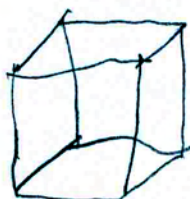

Draw CLOCK (Ten past eleven)  
(3 points)

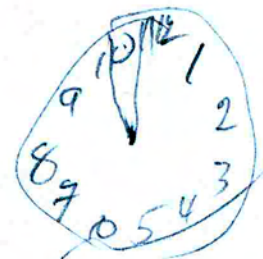

POINTS

Contour

Numbers

Hands

4/5
